# Supplementary material for: Separation of cell survival, growth, migration, and mesenchymal transdifferentiation effects of fibroblast secretome on tumor cells of head and neck squamous cell carcinoma
Source: PubMed Central journal article supplement — Tumour Biol. Author manuscript; Available in PMC 2018 Jul 9. (PMC6037299; doi:10.1177/1010428317705507), 2017-11
Supplement: NIHMS78339-supplement-Suppl_fig2.pdf [file NIHMS78339-supplement-Suppl_fig2.pdf]

Albumin medium

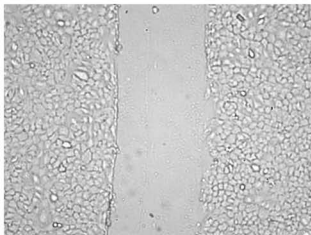

HGF conditioned medium

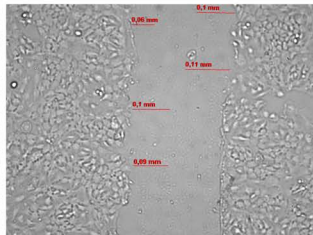

5 ng/ml TGF- $\beta$ 1

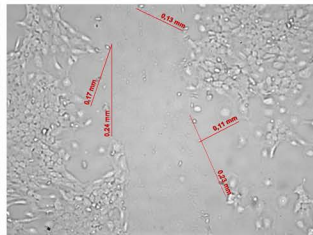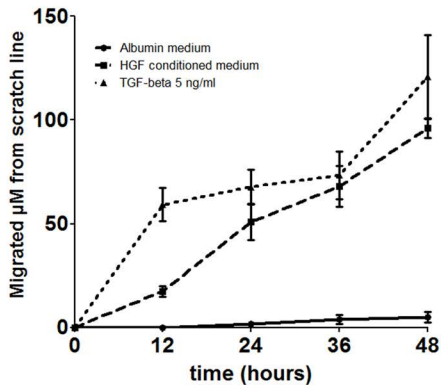

Migration of individual cells from scratched line
