# Supplementary material for: Separation of cell survival, growth, migration, and mesenchymal transdifferentiation effects of fibroblast secretome on tumor cells of head and neck squamous cell carcinoma
Source: PubMed Central journal article supplement — Tumour Biol. Author manuscript; Available in PMC 2018 Jul 9. (PMC6037299; doi:10.1177/1010428317705507), 2017-11
Supplement: NIHMS78339-supplement-Suppl_table1.pdf [file NIHMS78339-supplement-Suppl_table1.pdf]

**Supplementary Table 1 Used primer sequences with sources.**

| <b>Primer</b>      | <b>Sequence forward</b>      | <b>Sequence reverse</b>    | <b>Reference</b>                                               |
|--------------------|------------------------------|----------------------------|----------------------------------------------------------------|
| <b>β-actin</b>     | 5'-CTGGAACGGTGAAGGTGACA-3'   | 5'-GTCCTCGGCCACATTGTGA-3'  | Haller <i>et al.</i> (2004), Anal Biochem., 335(1):1-9         |
| <b>Vimentin</b>    | 5'-TGCCCTTAAAGGAACCAATGAG-3' | 5'-AAGGTGACGAGCCATTCCTC-3' | Franz <i>et al.</i> (2009), Histochem. Cell Biol., 131 651–660 |
| <b>E-cadherin</b>  | 5'-CAGTCAAAGGCCTCTACGG-3'    | 5'-GTGTATGTGGCAATGCGTTC-3' | Franz <i>et al.</i> (2009), Histochem. Cell Biol., 131 651–660 |
| <b>N-cadherin</b>  | 5'-GTGCATGAAGGACAGCCTCT-3'   | 5'-AGCTTCTCAGGCATACACC-3'  | Yu <i>et al.</i> (2012), PLoS One., 7(12):e51967               |
| <b>Desmoplakin</b> | 5'-CAGGATGTACTATTCTCGGCG-3'  | 5'-GTGTTCTGGTTCTGGTGCCT-3' | Source: NIH, Bethesda, MD, USA                                 |
