# Supplementary material for: Separation of cell survival, growth, migration, and mesenchymal transdifferentiation effects of fibroblast secretome on tumor cells of head and neck squamous cell carcinoma
Source: PubMed Central journal article supplement — Tumour Biol. Author manuscript; Available in PMC 2018 Jul 9. (PMC6037299; doi:10.1177/1010428317705507), 2017-11
Supplement: NIHMS78339-supplement-Suppl_table2.pdf [file NIHMS78339-supplement-Suppl_table2.pdf]

**Supplementary Table 2: Antibodies used.**

**List of primary Antibodies.** The molecular weight, the dilution applied in the western blot, the concentration, the isotype, the manufacturer ID and the catalogue number can be seen in the table.

| <b>Antibody</b>                          | <b>Molecular weight</b> | <b>Western blot dilution</b> | <b>Concentration (µg/mL)</b> | <b>Isotype</b>         | <b>Manufacturer ID</b>        | <b>Catalogue number</b> |
|------------------------------------------|-------------------------|------------------------------|------------------------------|------------------------|-------------------------------|-------------------------|
| Vimentin, against whole protein          | 57 kDa                  | 1:1,000                      | 200                          | Mouse monoclonal IgM   | EXBIO Praha, a.s.             | 11-460-C100             |
| E-cadherin, against intracellular domain | 120 kDa                 | 1:2,500                      | 250                          | Mouse monoclonal IgG2a | BD Transduction Laboratories™ | 610181                  |
| Beta-actin (6C5)                         | 42 kDa                  | 1:15,000                     | Not specified                | Mouse monoclonal IgM   | Proteintech                   | 60008-1-Ig              |

**List of Secondary Antibodies.** The concentration, the host, the antigen, the label, the manufacturer ID and the catalogue number are given.

| <b>Antibody</b>      | <b>Western Blot dilution</b> | <b>Conc. (µg/mL)</b> | <b>Host</b> | <b>Antigen</b>  | <b>Label</b>           | <b>Manufacturer ID</b>         | <b>Catalogue number</b> |
|----------------------|------------------------------|----------------------|-------------|-----------------|------------------------|--------------------------------|-------------------------|
| ImmunoPure® Antibody | 1:50,000                     | 800                  | Goat Anti-  | Mouse IgG (H+L) | Horseradish Peroxidase | Thermo Fisher Scientific, Inc. | 31430                   |
| Secondary Antibody   | 1:2,000                      | 400                  | Goat Anti-  | Mouse IgM       | Horseradish Peroxidase | Santa Cruz Biotechnology, Inc. | Sc-2064                 |
