# Supplementary figures and images for: Separation of cell survival, growth, migration, and mesenchymal transdifferentiation effects of fibroblast secretome on tumor cells of head and neck squamous cell carcinoma
Source: PubMed Central journal article supplement — Tumour Biol. Author manuscript; Available in PMC 2018 Jul 9. (PMC6037299; doi:10.1177/1010428317705507), 2017-11

Albumin medium treated

TGF- $\beta$ -1 treated

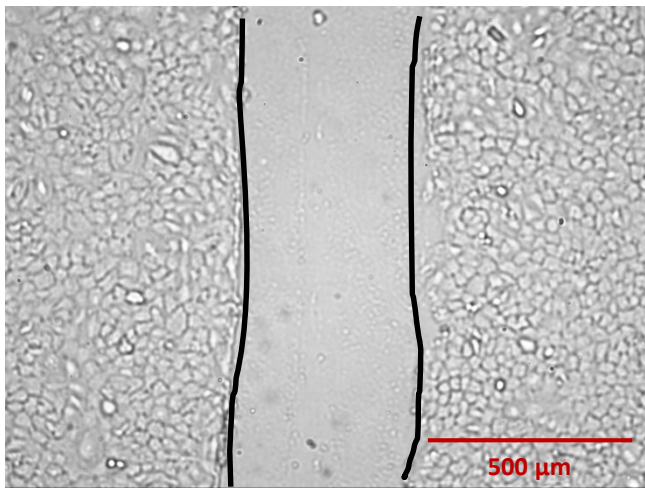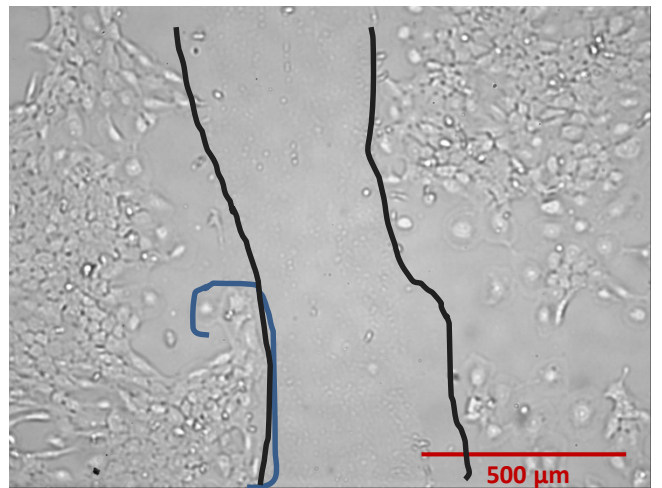

0h

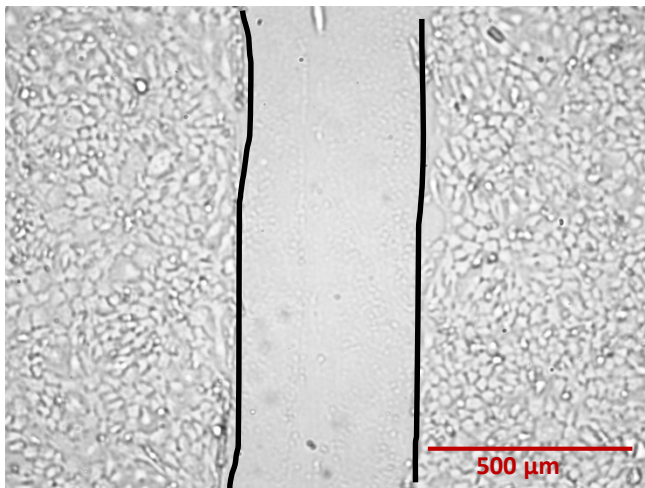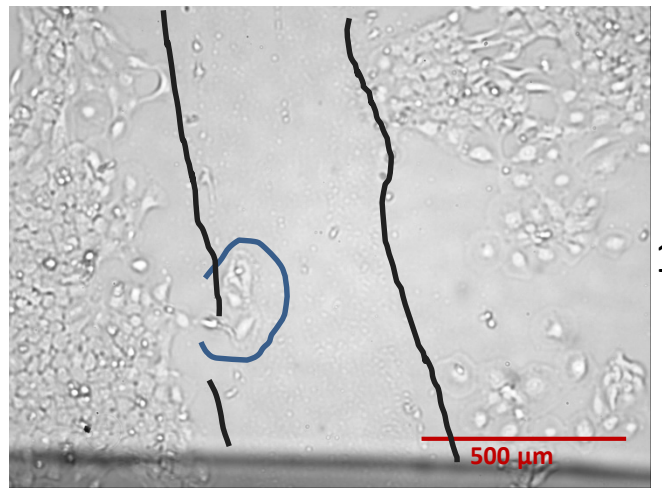

12h

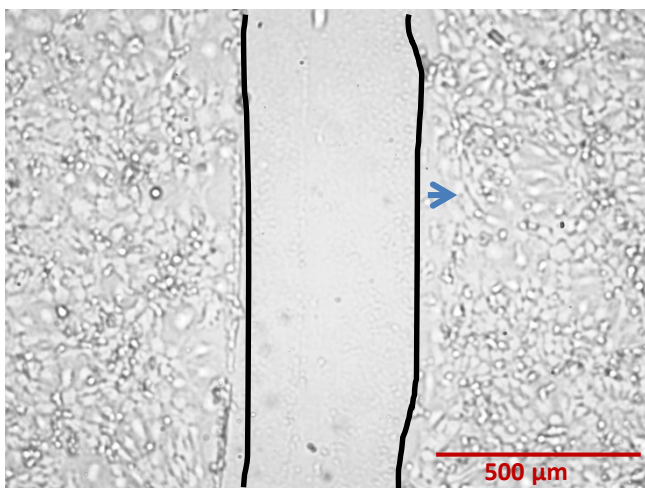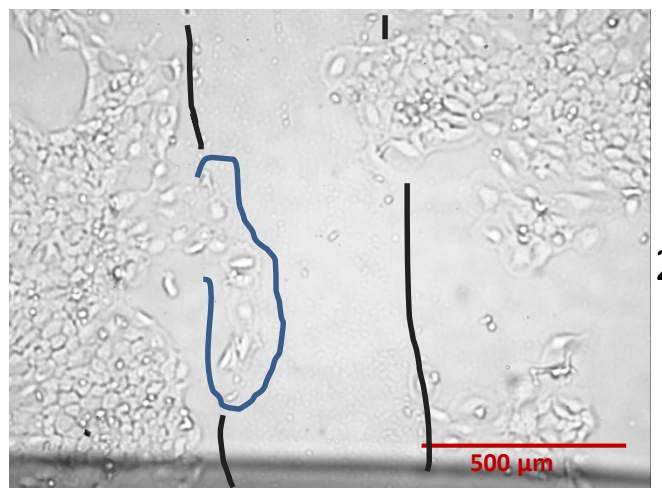

24h

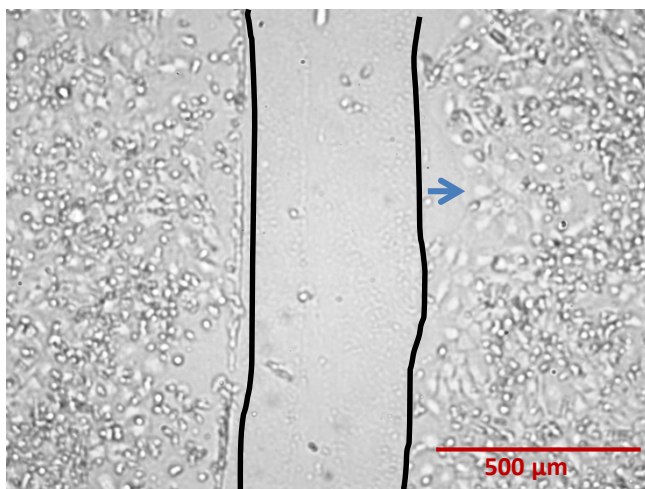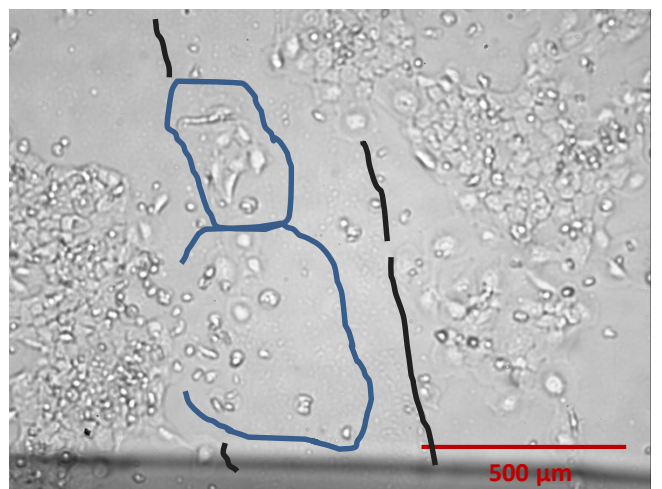

48h

Supplement: NIHMS78339-supplement-Suppl_fig1.pdf [file NIHMS78339-supplement-Suppl_fig1.pdf]
